# Supplementary material for: Improved electrochemical conversion of CO2 to multicarbon products by using molecular doping
Source: Research Square preprint supplement (doi:10.21203/rs.3.rs-566621/v1), 2021-06-12
Supplement: Supplementary file 2 [file 49ef30b336e1d05a06debb26.docx]

**Supplementary Information for**

# Improved electrochemical conversion of CO2 to multicarbon products by using molecular doping

Huali Wu1, Ji Li1,2, Kun Qi1, Yang Zhang1, Eddy Petit1, Wensen Wang1, Valérie Flaud3, Nicolas Onofrio1, Bertrand Rebiere3, Lingqi Huang4, Chrystelle Salameh1, Luc Lajaunie5,6, Philippe Miele1,7, Damien Voiry1*

*1 Institut Européen des Membranes, IEM, UMR 5635, Université Montpellier, ENSCM, CNRS, Montpellier 34000, France*

*2College of Bioresources and Materials Engineering, Shanxi University of Science & Technology, Xi’an 710021, PR China*

*3 Institut Charles Gerhardt, ICGM, UMR 5253, University of Montpellier, ENSCM, CNRS, 34095 Montpellier Cedex5, France*

*4School of Science and Engineering, The Chinese University of Hong Kong, Shenzhen, Guangdong, 518172, PR China*

*5 Departamento de Ciencia de los Materiales e Ingeniería Metalúrgica y Química Inorgánica, Facultad de Ciencias, Universidad de Cádiz, Campus Río San Pedro S/N, Puerto Real, 11510, Cádiz, Spain*

*6 Instituto Universitario de Investigación de Microscopía Electrónica y Materiales (IMEYMAT), Facultad de Ciencias, Universidad de Cádiz, Campus Río San Pedro S/N, Puerto Real 11510, Cádiz, Spain*

*7* *Institut Universitaire de France (IUF), 1 rue Descartes, 75231 Paris Cedex 05*

**Table of content**

**Sections**

[**Supplementary Figure 1.** SEM images of pure Ag. 4](#_Toc72829110)

[**Supplementary Figure 2.** SEM images of the Ag-Cu electrodes with different Ag atomic ratios. 4](#_Toc72829111)

[**Supplementary Figure 3.** Molecular structures of the different molecules used for the functionalization of Ag-Cu. 5](#_Toc72829112)

[**Supplementary Figure 4.** Schematic representations of the different configurations of N2SN on Cu (side view). 6](#_Toc72829113)

[**Supplementary Figure 5.** The different configurations of N2SN on Cu (top view) used for the calculation results. 6](#_Toc72829114)

[**Supplementary Figure 6.** SEM figures for the pristine and functionalized Ag-Cu. 7](#_Toc72829115)

[**Supplementary Figure 7.** Wettability of the pristine and functionalized Ag-Cu electrodes. 8](#_Toc72829116)

[**Supplementary Figure 8.** Structural and compositional analyses of the 15 %at. Ag-Cu-N2SN catalyst. 9](#_Toc72829117)

[**Supplementary Figure 9.** HAADF-STEM data of N2SN-functionalized Ag-Cu catalyst. 9](#_Toc72829118)

[**Supplementary Figure 10.** Fourier transformed infrared (FTIR) spectra of the pristine functional groups. 10](#_Toc72829119)

[**Supplementary Figure 11.** X-ray photoelectron spectra (XPS) spectra of the different Ag-Cu catalysts. 11](#_Toc72829120)

[**Supplementary Figure 12.** X-ray diffraction (XRD) data of the different Ag-Cu catalysts. 11](#_Toc72829121)

[**Supplementary Figure 13.** Comparisons of the Faradaic efficiencies on the different catalysts measured in the H-cell reactors. 12](#_Toc72829122)

[**Supplementary Figure 14.** Representative NMR spectra of the liquid products formed on N2SN-functionalized Ag-Cu. 13](#_Toc72829123)

[**Supplementary Figure 15.** CO2RR performance in the H-cell reactors. 13](#_Toc72829124)

[**Supplementary Figure 16.** Electrochemical impedance spectroscopy (EIS) measured for the different Ag-Cu catalysts. 14](#_Toc72829125)

[**Supplementary Figure 17.** Stability measurements of N2SN-, N3N- functionalized Ag-Cu compared with pristine Ag-Cu measured in the H-cell reactors. 14](#_Toc72829126)

[**Supplementary Figure 18.** X-ray photoelectron spectra of N2SN before and after CO2RR. 15](#_Toc72829127)

[**Supplementary Figure 19.** Estimated N/Cu ratio of the N2SN-Ag-Cu electrodes along the CO2RR operating time. 15](#_Toc72829128)

[**Supplementary Figure 20.** Cu K-edge X-ray absorption near edge structure (XANES) spectra of the different Ag-Cu catalysts. 16](#_Toc72829129)

[**Supplementary Figure 21.** *Operando* Raman spectra of N2SN-, N3N-, C2N-, and C3-functionalized Ag-Cu electrodes. 17](#_Toc72829130)

[**Supplementary Figure 22.** Deconvolution of the Raman signals around 2000 cm-1. 18](#_Toc72829131)

[**Supplementary Figure 23.** Relationship between the ratio of COatop and CObridge with the oxidation degree of Cu obtained from our XANES measurements. 18](#_Toc72829132)

[**Supplementary Figure 24.** Photograph of a 5-cm-2 membrane–electrode-assembly (MEA) cell. 19](#_Toc72829133)

[**Supplementary Figure 25.** Schematic representation of the experimental setup for the CO2 electrolysis in a MEA electrolyzer. 19](#_Toc72829134)

[**Supplementary Figure 26.** Linear sweep voltammetry (LSV) curves of the N2SN-functionalized Ag-Cu catalyst. 20](#_Toc72829135)

[**Supplementary Figure 27.** Electrocatalytic CO2RR properties of the MEA electrolyzers using the different Ag-Cu catalysts. 21](#_Toc72829136)

[**Supplementary Figure 28.** CO2 electroreduction performance in the MEA electrolyzers. 21](#_Toc72829137)

[**Supplementary Figure 29.** Enhancement factor of FEC2+ for N2SN-Ag-Cu and N3N-Ag-Cu compared to pristine. 22](#_Toc72829138)

[**Supplementary Figure 30.** Selectivity for C1-2+ hydrocarbons on the different electrodes in the MEA electrolyzers. 22](#_Toc72829139)

[**Supplementary Figure 31.** SEM pictures of the N2SN-Ag-Cu catalyst after electrolysis in MEA. 23](#_Toc72829140)

[**Supplementary Table 1.** Summary of the total energy and adsorption energy of the different configurations of the thiadiazole-functionalized Cu catalyst. 23](#_Toc72829141)

[**Supplementary Table 2.** Summary of the XPS data for N2SN-functionalized Ag-Cu at different reaction times. 2](#_Toc72829142)3

[**Supplementary Table 3.** Summary of the Cu binding energy from the Auger L3M45M45 transition modes for pristine, N2SN-, N3N-, C2N-, C3-functionalized Ag-Cu samples and H2O2-oxidized Ag-Cu. 2](#_Toc72829143)4

[**Supplementary Table 4.** Summary of the XANES data. E0 and corresponding oxidation states (δ) of Cu. 2](#_Toc72829144)4

[**Supplementary Table 5.** Estimated ratios (in peak area) between the atop CO and the bridge CO obtained from the deconvoluted spectra. 2](#_Toc72829145)4

[**Supplementary Table 6.** Summary of the estimated FEs for different groups functionalized Ag-Cu electrodes measured at different applied potentials in the H-cell reactors. 25](#_Toc72829146)

[**Supplementary Table 7.** Summary of the FEs obtained on the different functionalized Ag-Cu electrodes measured at different applied potentials in the MEA electrolyzers. 27](#_Toc72829147)

**Supplementary Figures**

**
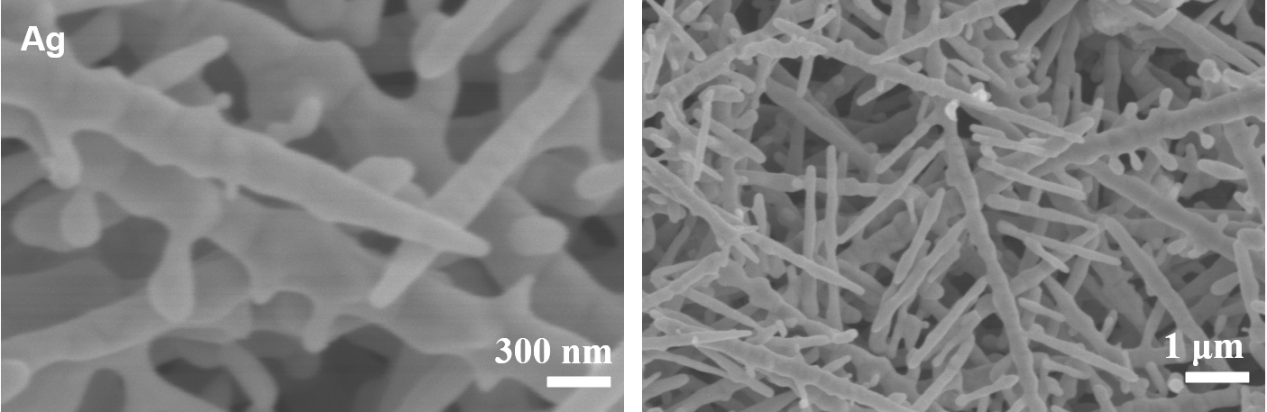
**

# Supplementary Figure 1. SEM images of pure Ag.

**
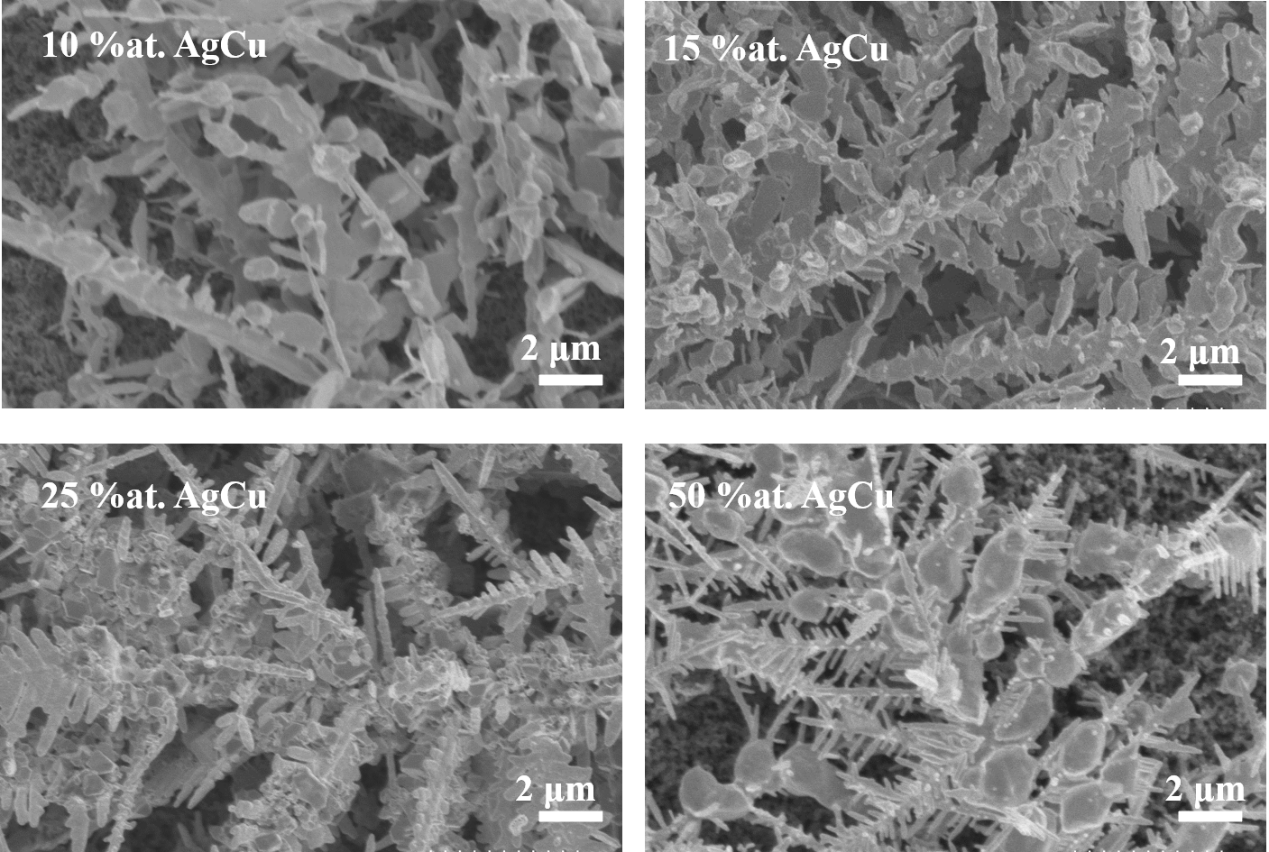
**

# Supplementary Figure 2. SEM images of the Ag-Cu electrodes with different Ag atomic ratios. SEM images of different atomic ratios of Ag in Ag-Cu electrodes（10 %at., 15 %at., 25 %at. and 50 %at.）.

**
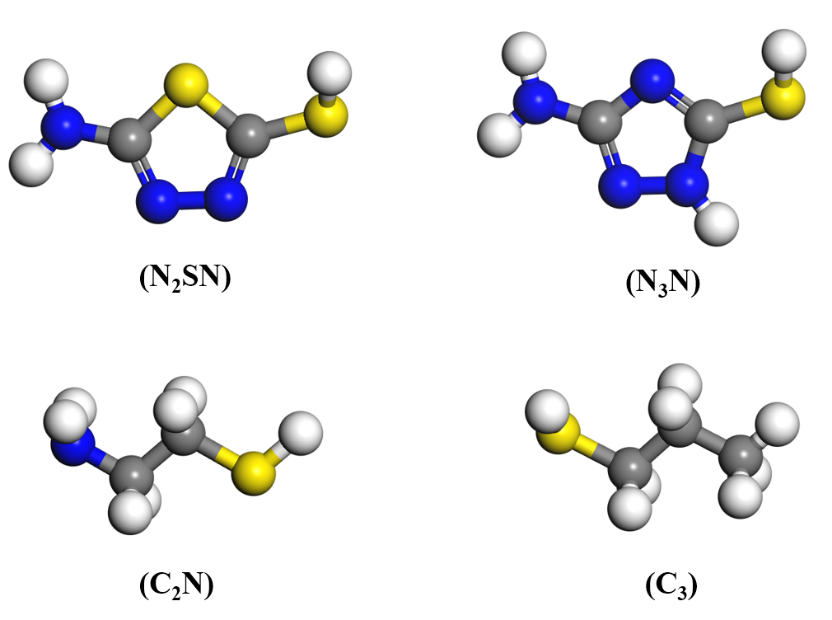
**

# Supplementary Figure 3. Molecular structures of the different molecules used for the functionalization of Ag-Cu.

**
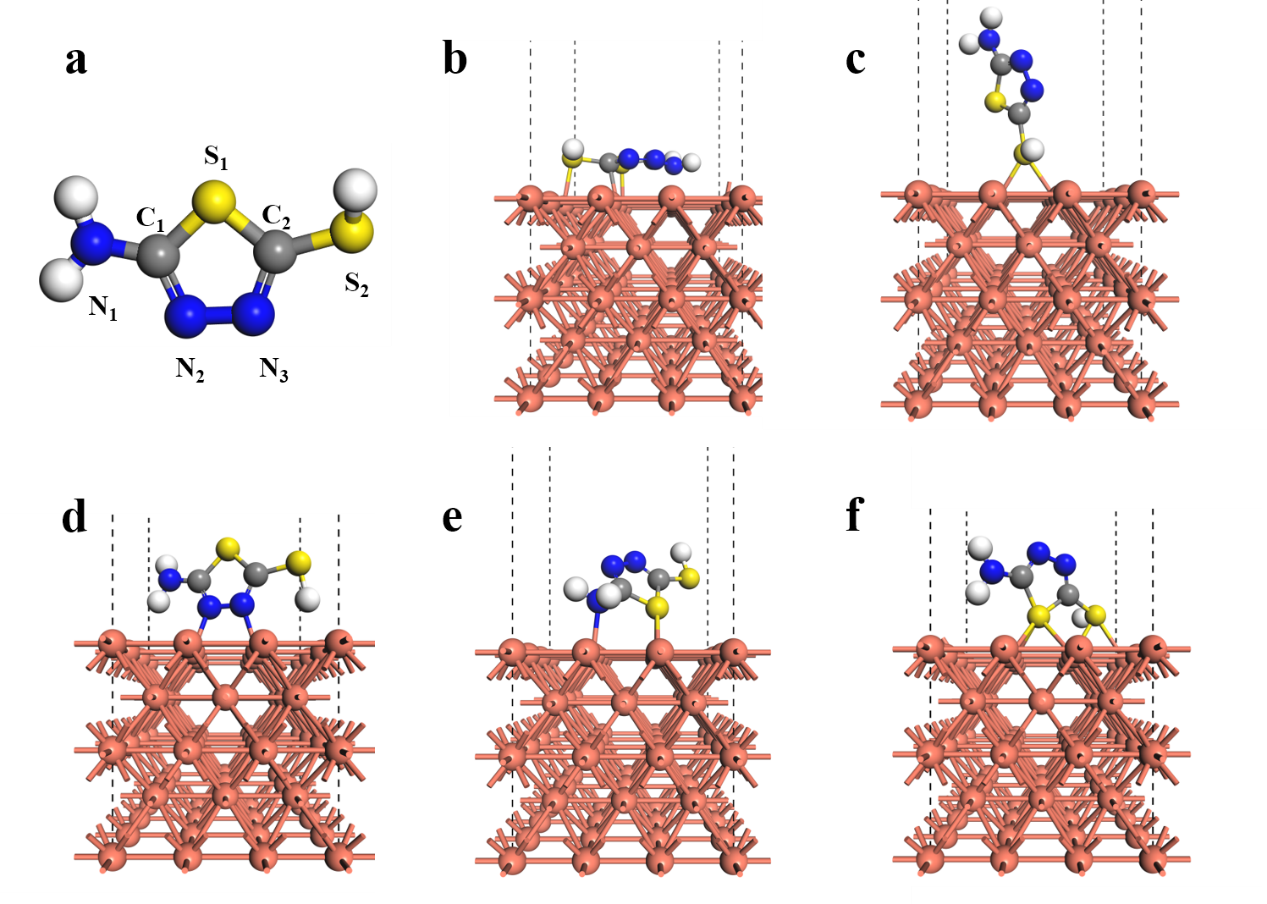
**

# Supplementary Figure 4. Schematic representations of the different configurations of N2SN on Cu (side view). Molecular structure of N2SN (a), S1-C2-S2 flat model (b), S1 model (c), N2-N3 model (d), N1-S1 model (e) and S1-S2 model (f).

**
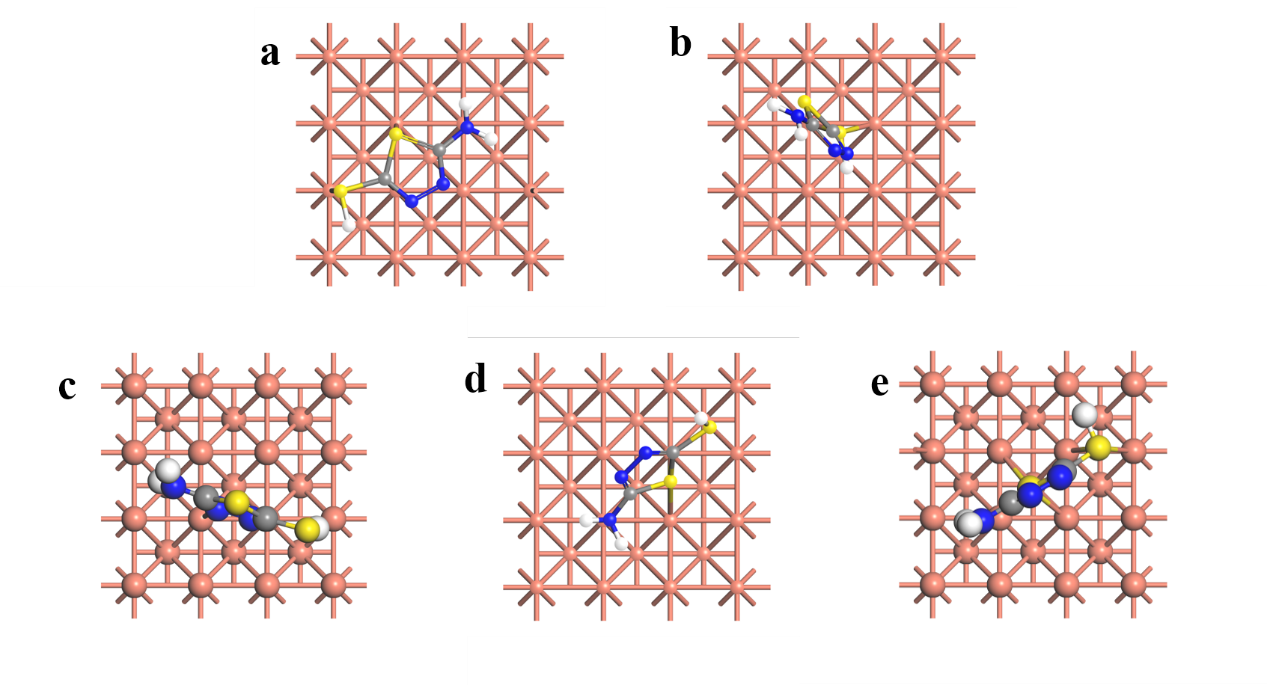
**

# Supplementary Figure 5. The different configurations of N2SN on Cu (top view) used for the calculation results summarized in Supplementary Table 1. S1-C2-S2 flat model (a), S1 model (b), N2-N3 model (c), N1-S1 model (d) and S1-S2 model (e).

**
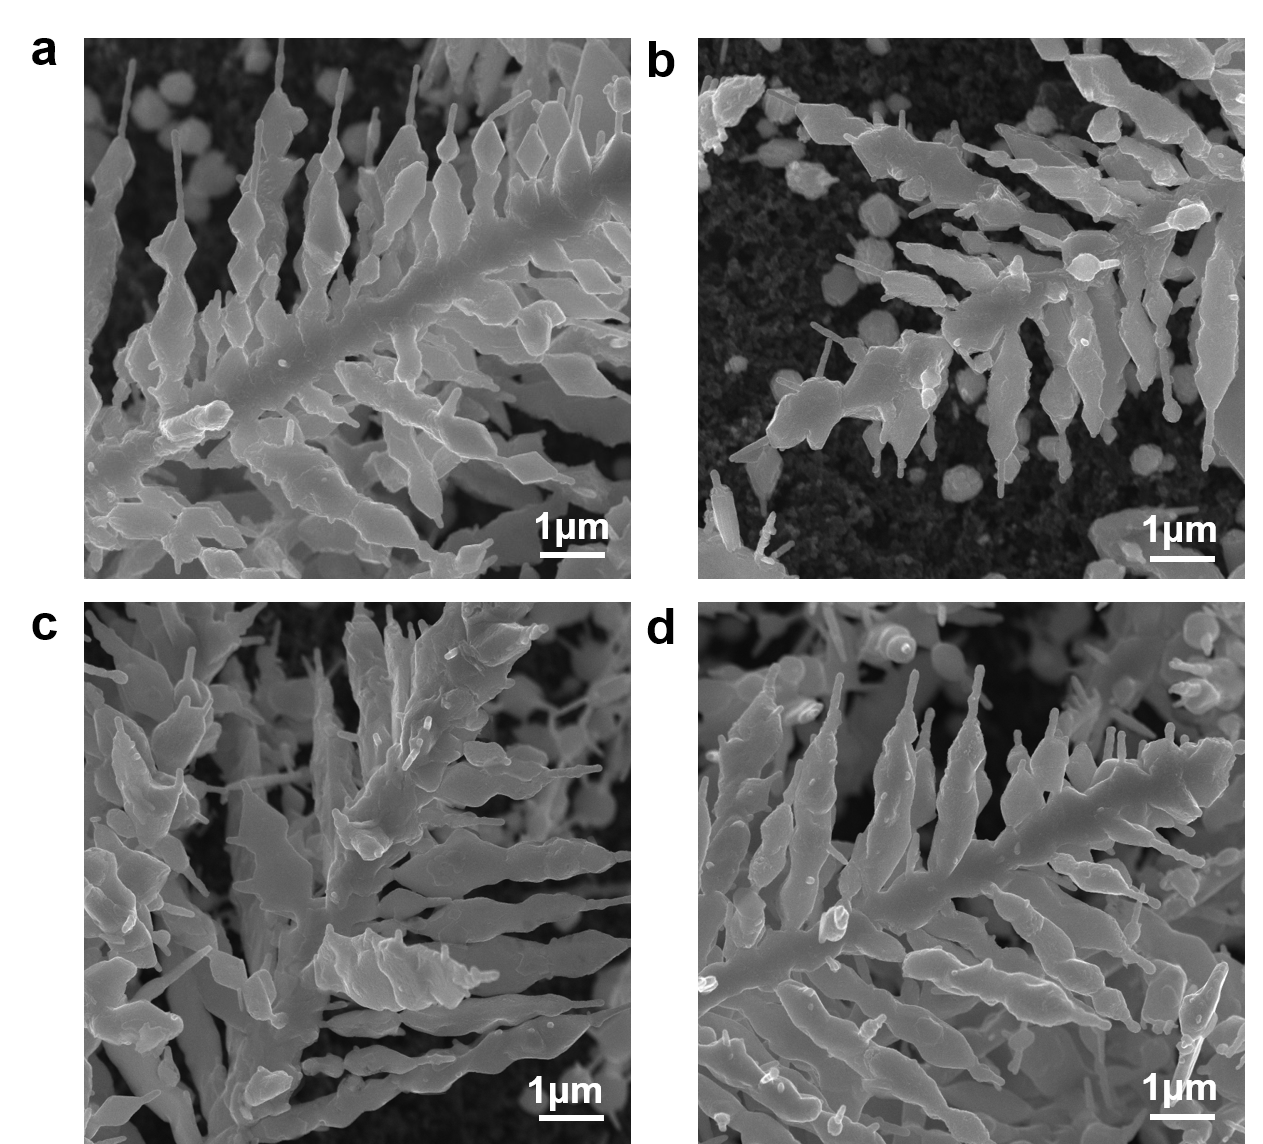
**

# Supplementary Figure 6. SEM figures for the pristine and functionalized Ag-Cu. SEM figures of different functional groups modified 15 %at. Ag-Cu electrodes: P (a), (b) N3N, (c) C2N and (d) C3.


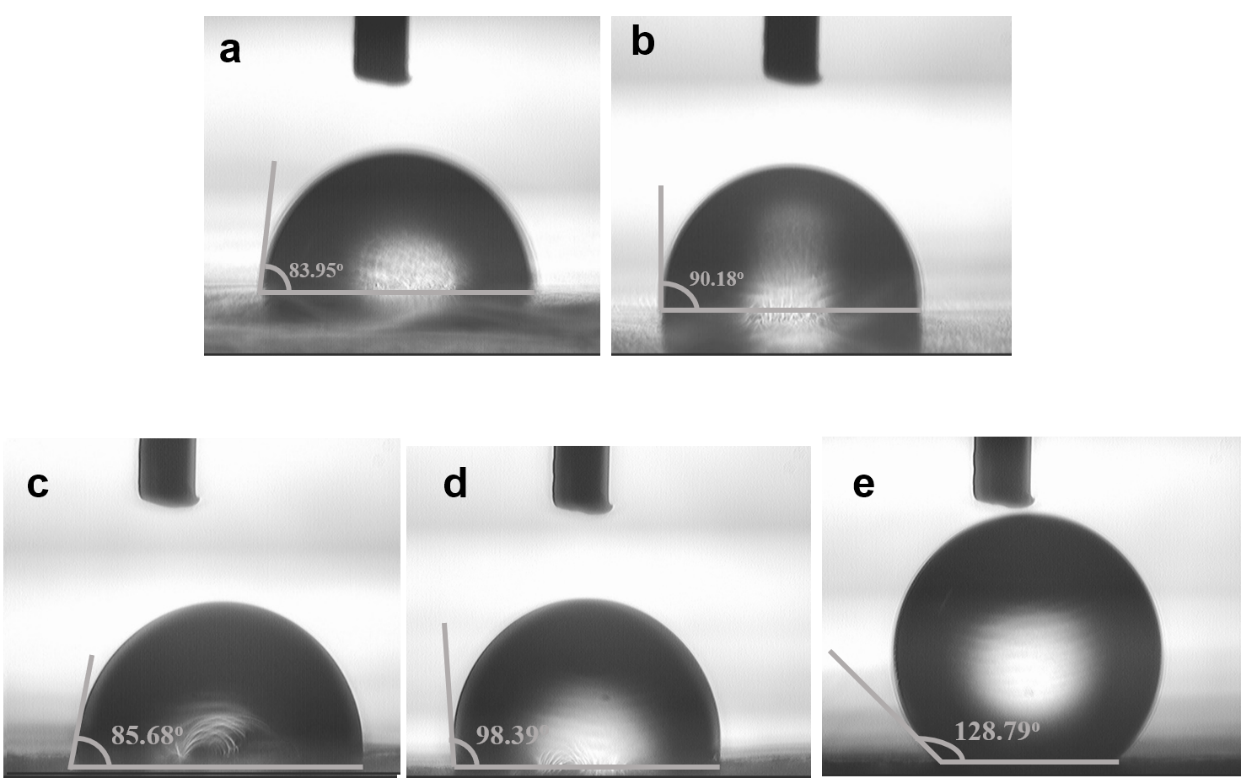


# **Supplementary Figure 7. Wettability of the pristine and functionalized Ag-Cu electrodes.** The water contact angles measured for 15 %at. Ag-Cu: P (a), N2SN (b), N3N (c), C2N (d) and C3 (e) before CO2RR.

**
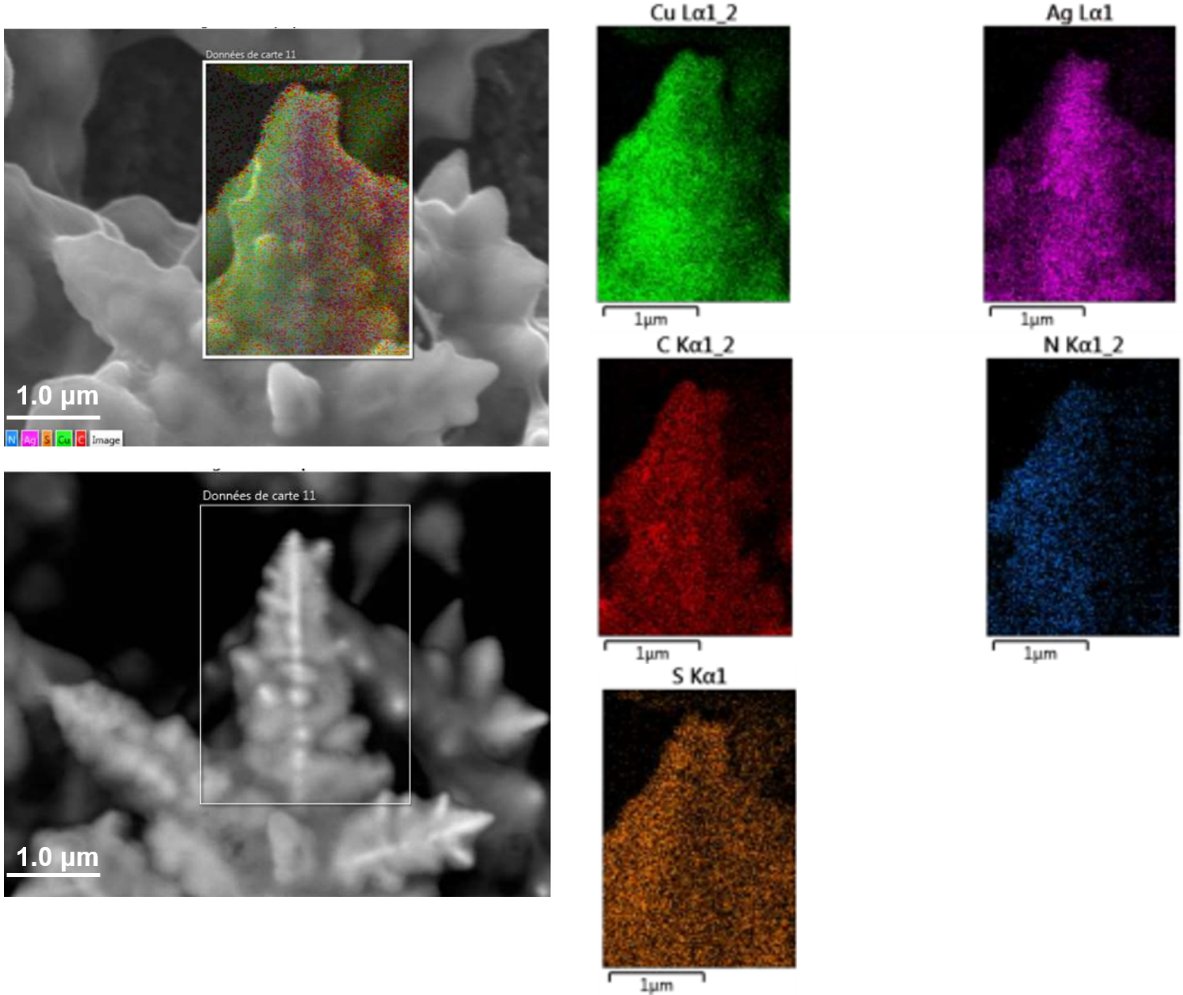
**

# **Supplementary Figure 8.** Structural and compositional analyses of the 15 %at. Ag-Cu-N2SN catalyst. Low magnification SEM images (top left panel) and the related EDX elemental mapping of Cu, Ag, C, N, and S (right panels).

**
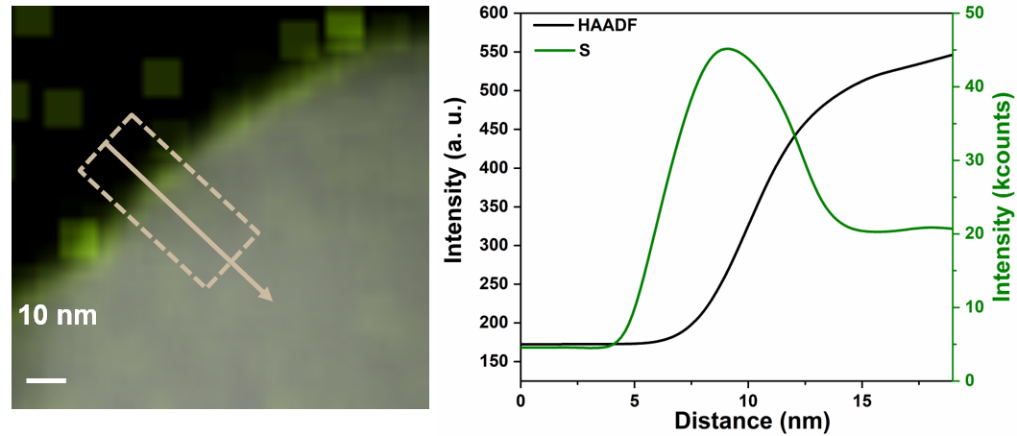
**

# **Supplementary Figure 9**. HAADF-STEM data of N2SN-functionalized Ag-Cu catalyst. *Right panel:* The superposition of the HAADF-STEM image of the N2SN functionalized Ag-Cu ultrathin section with the sulfur (S) EDS elemental map. The arrow highlights the area used to extract the intensity profiles. *Left panel:* The corresponding intensity profiles of the HAADF-STEM images and S elemental map.





# **Supplementary Figure 10.** Fourier transformed infrared (FTIR) spectra of the pristine functional groups. The ATR-FTIR spectra of pristine (non-functionalized) 15 %at. Ag-Cu (gray), 15 %at. Ag-Cu-N2SN (purple), 15 %at. Ag-Cu-N3N (blue), 15 % at. Ag-Cu-C2N (green) and 15 %at. Ag-Cu-C3 (orange) before CO2RR.


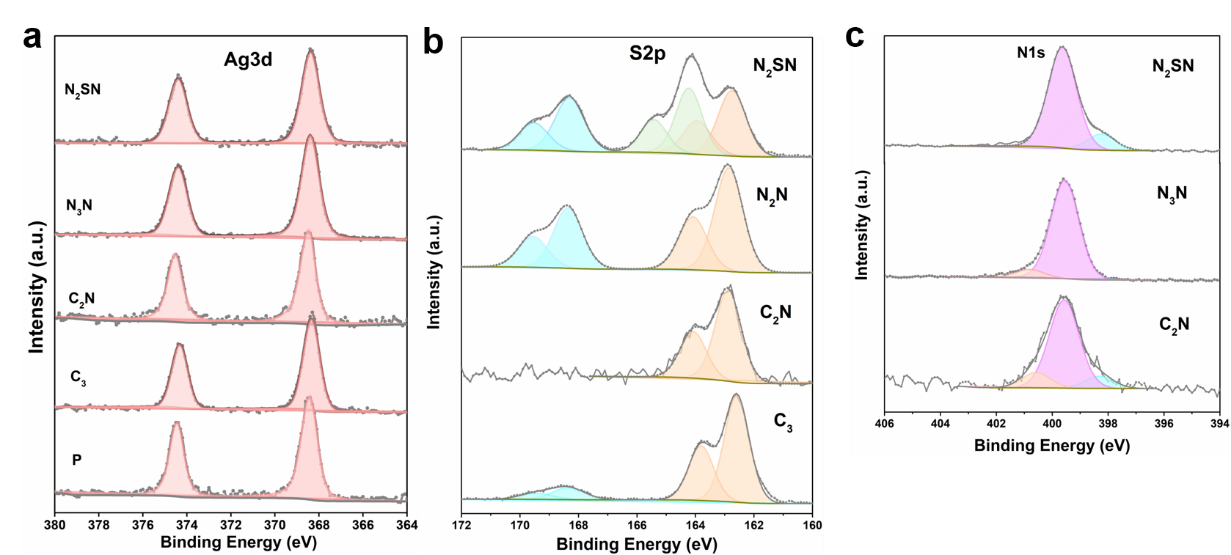


# **Supplementary Figure 11.** X-ray photoelectron spectra (XPS) spectra of the different Ag-Cu catalysts. The high-resolution XPS spectra of the Ag3d (a), S2p (b) and N1s (c) regions of the different functionalized 15 %at. Ag-Cu catalysts before reaction.

**

**

# **Supplementary Figure 12. X-ray diffraction (XRD) data of the different Ag-Cu catalysts.** Powder XRD spectra of 15 %at. Ag-Cu and 15 %at. Ag-Cu-N2SN compared with Cu, Ag metals used as references.


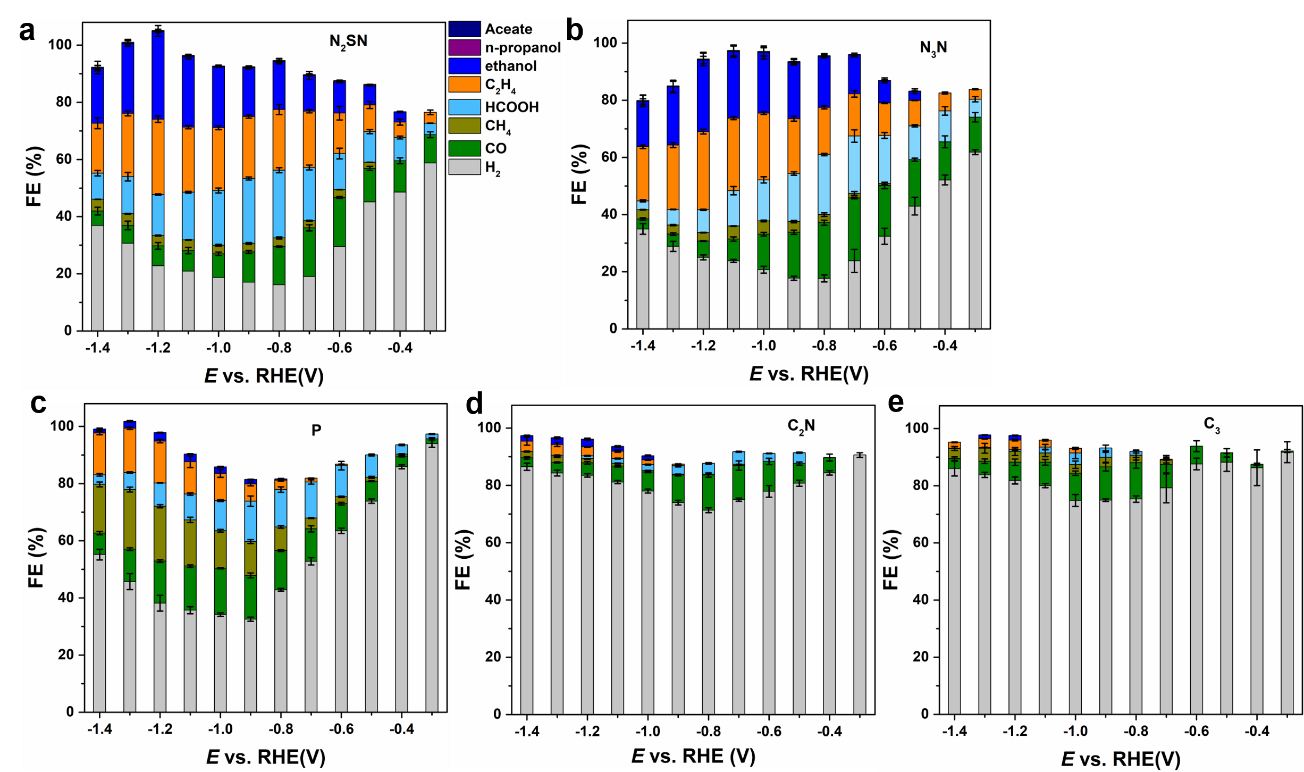


# Supplementary Figure 13. Comparisons of the Faradaic efficiencies on the different catalysts measured in the H-cell reactors. The Faradaic efficiency for the different products on N2SN-(a), N3N-(b), C2N-(d) and C3-(e) Ag-Cu electrodes, as well as pristine sample (c).

**

**

# **Supplementary Figure 14. Representative NMR spectra of the liquid products formed on N2SN-functionalized Ag-Cu.** 1H NMR spectra of liquid products collected from the electrolyte after 30 min at –1.2 V versus the reversible hydrogen electrode (*vs.* RHE).


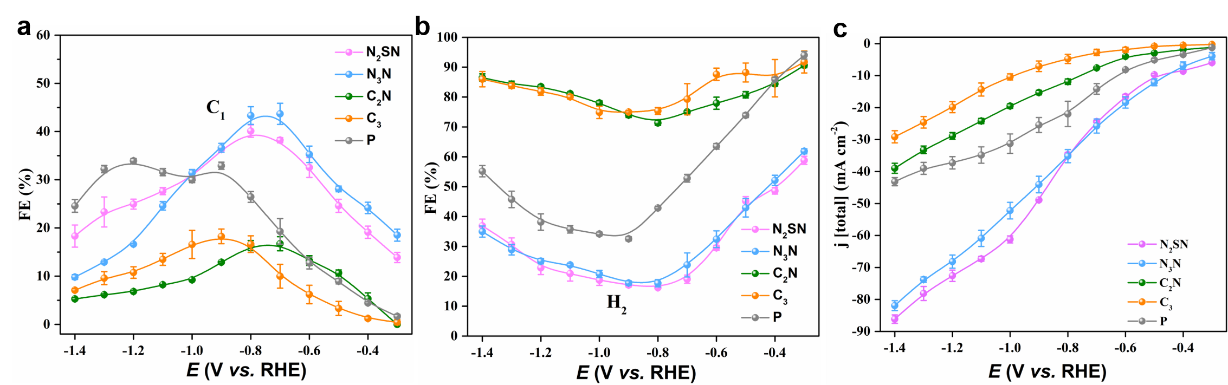


# Supplementary Figure 15. CO2RR performance in the H-cell reactors. a, b FE values for C1 products (a) and H2 (b) on the different catalysts at various potentials ranging from -0.3 to −1.4 V *vs.* RHE in 0.5 M KHCO3. c, *j*–V plots of the total current densities versus the RHE on different samples in 0.5 M KHCO3





# **Supplementary Figure 16.** Electrochemical impedance spectroscopy (EIS) measured **for the different Ag-Cu catalysts.** The EIS spectrameasured in the H-cell configuration for pristine (non-functionalized) 15 %at. Ag-Cu (gray), 15 %at. Ag-Cu-N2SN (purple), 15 %at. Ag-Cu-N3N (blue), 15 % at. Ag-Cu-C2N (green) and 15 % at. Ag-Cu-C3 (orange). The EIS data were recorded in CO2-saturated 0.5 M KHCO3 solution.





# **Supplementary Figure** **17. Stability measurements of N2SN-, N3N- functionalized Ag-Cu compared with pristine Ag-Cu measured in the H-cell reactors.** The stability of Ag-Cu-N2SN, Ag-Cu-N3N and Ag-Cu were obtained at -1.2 V vs. RHE without *iR*-correction.


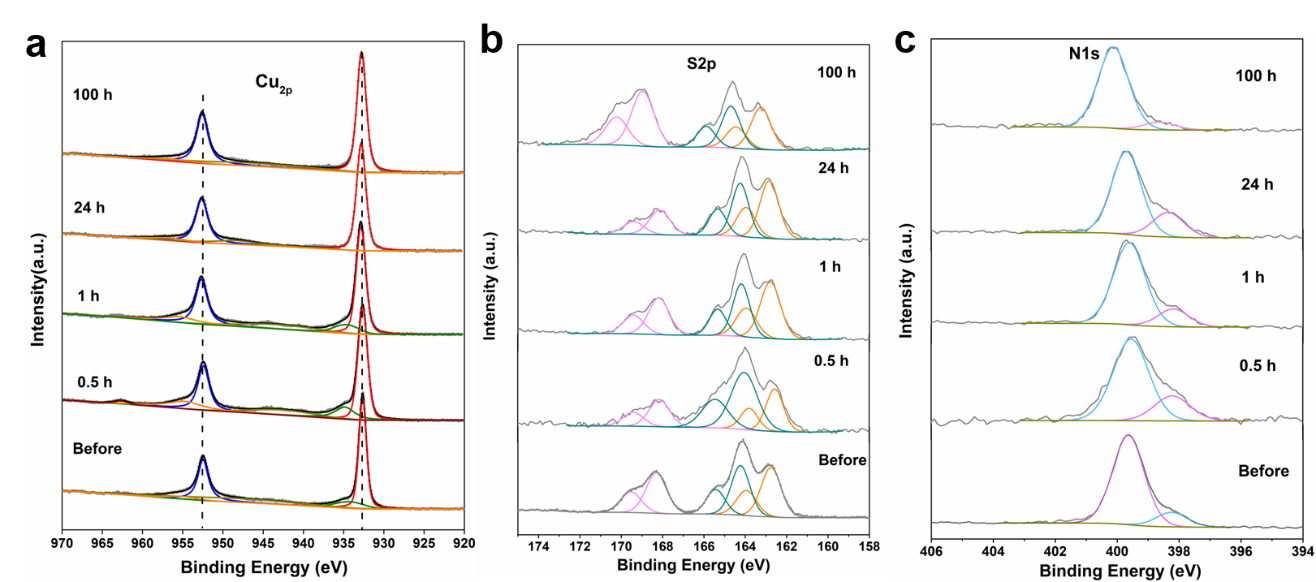


# **Supplementary Figure 18.** X-ray photoelectron spectra **of N2SN before and after CO2RR.** The XPS data from the Cu2p (a), S2p (b) and N1s (c) regions were measured before and after operation up to 100 h at -1.2 V *vs.* RHE.





# **Supplementary Figure 19. Estimated N/Cu ratio of the N2SN-Ag-Cu electrodes along the CO2RR operating time.** The atomic N/Cu ratio of Ag-Cu-N2SN were estimated from the deconvoluted XPS spectra shown in Supplementary Figure 18.





# **Supplementary Figure 20. Cu K-edge** X-ray absorption near edge structure (XANES) spectra of the different Ag-Cu catalysts. Magnification of the *operando* Cu K-edge XANES spectra of N2SN-functionalized Ag-Cu electrode during CO2RR. The *operando* XANES measurements were performed after applying a fixed potential *vs.* RHE for 30 minutes.


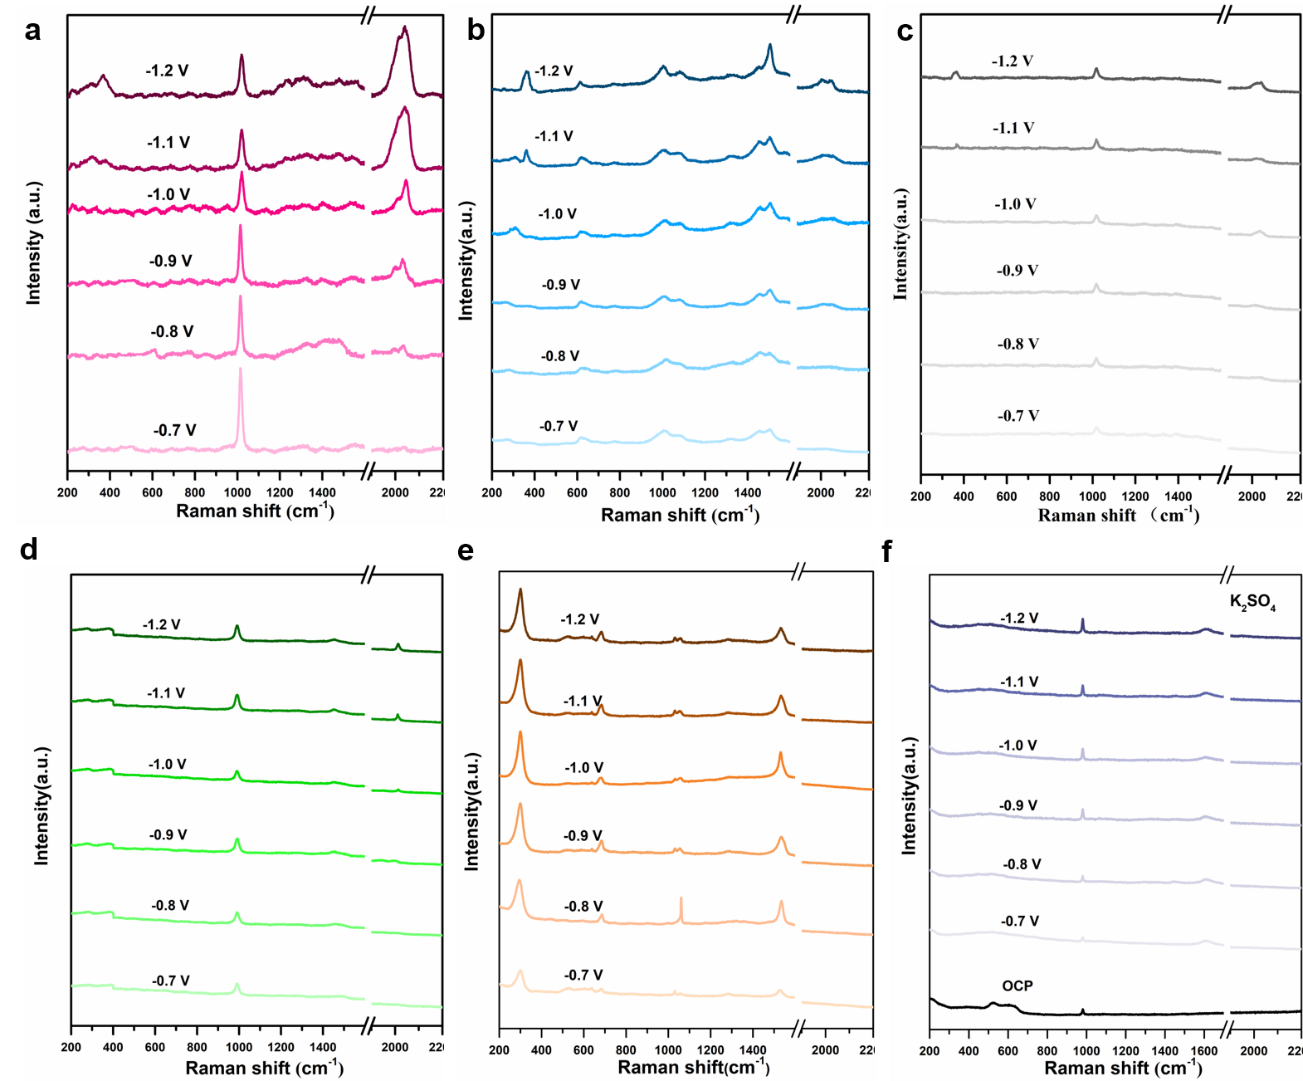


# **Supplementary Figure 21. *Operando* Raman spectra of (a) N2SN-, (b) N3N-, (c) C2N-, and (d) C3-functionalized Ag-Cu electrodes compared with (e) pristine Ag-Cu. a-e**,The *operando* Raman measurements were carried out between -0.7 V and -1.2 V *vs.* RHE in a CO2-saturated KHCO3 solution. To confirm that the signals are solely coming from the CO2RR, the N2SN-functionalized Ag-Cu catalyst was also tested in a Ar-saturated K2SO4 electrolyte solution (f).


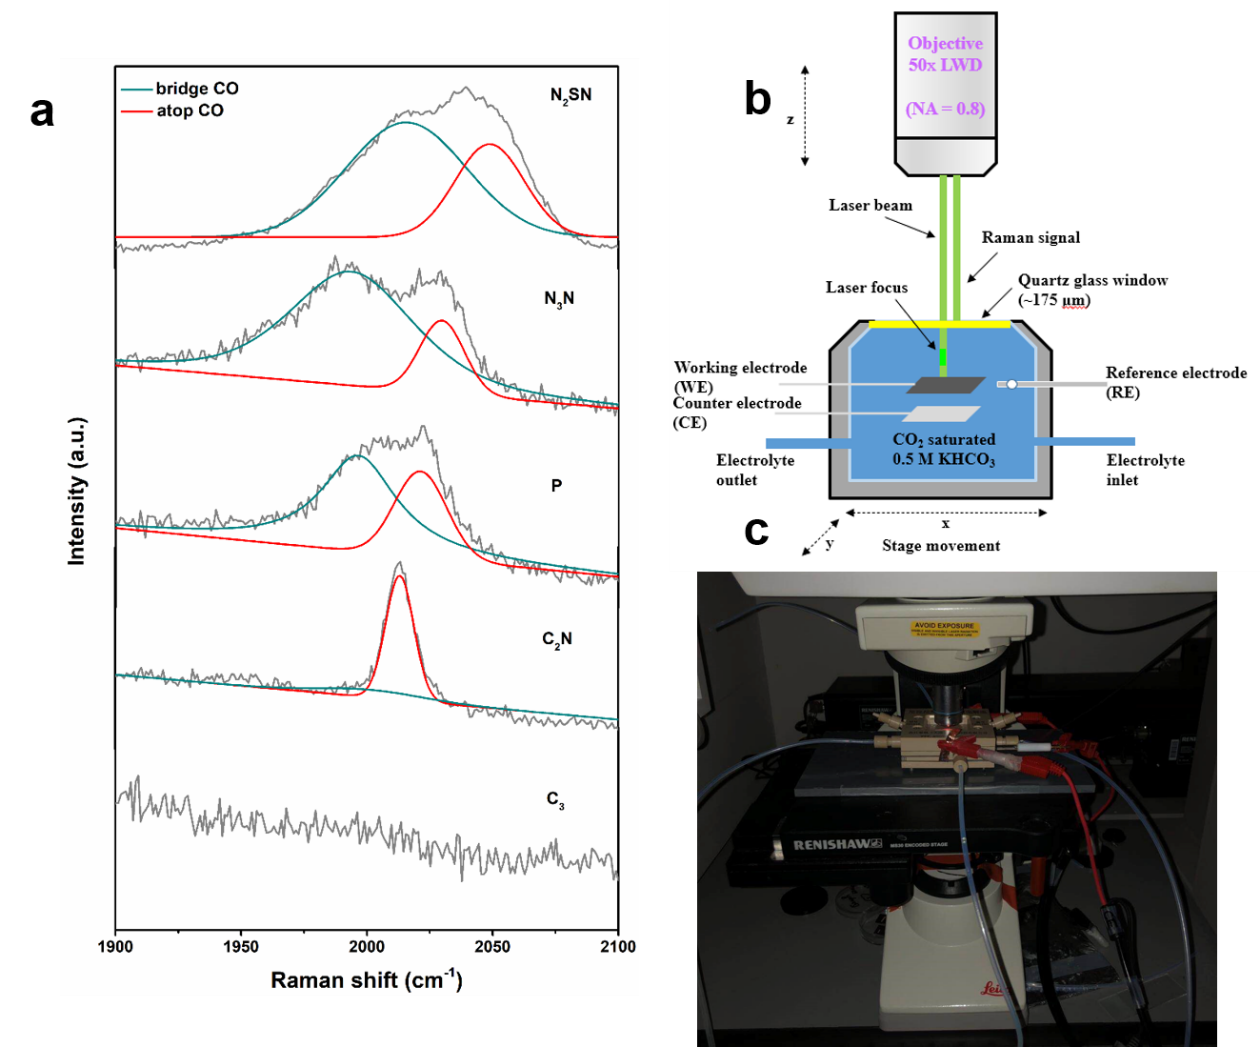


# **Supplementary Figure 22. Deconvolution of the Raman signals around 2000 cm-1.** *Right panel:**Operando* Raman spectra centered around 2000 cm-1 representing the C≡O stretch region on pristine and functionalized Ag-Cu electrodes. The asymmetric signals were deconvoluted into two components for the atop and the bridge CO using Lorentzian curves. The ratio of the intensities (in area) of the two bands is summarized in Supplementary Table 5. *Left panel:* Schematic representation and photograph of the *operando* setup.





# **Supplementary Figure 23. Relationship between the ratio of COatop and CObridge with the oxidation degree of Cu obtained from our XANES measurements.**


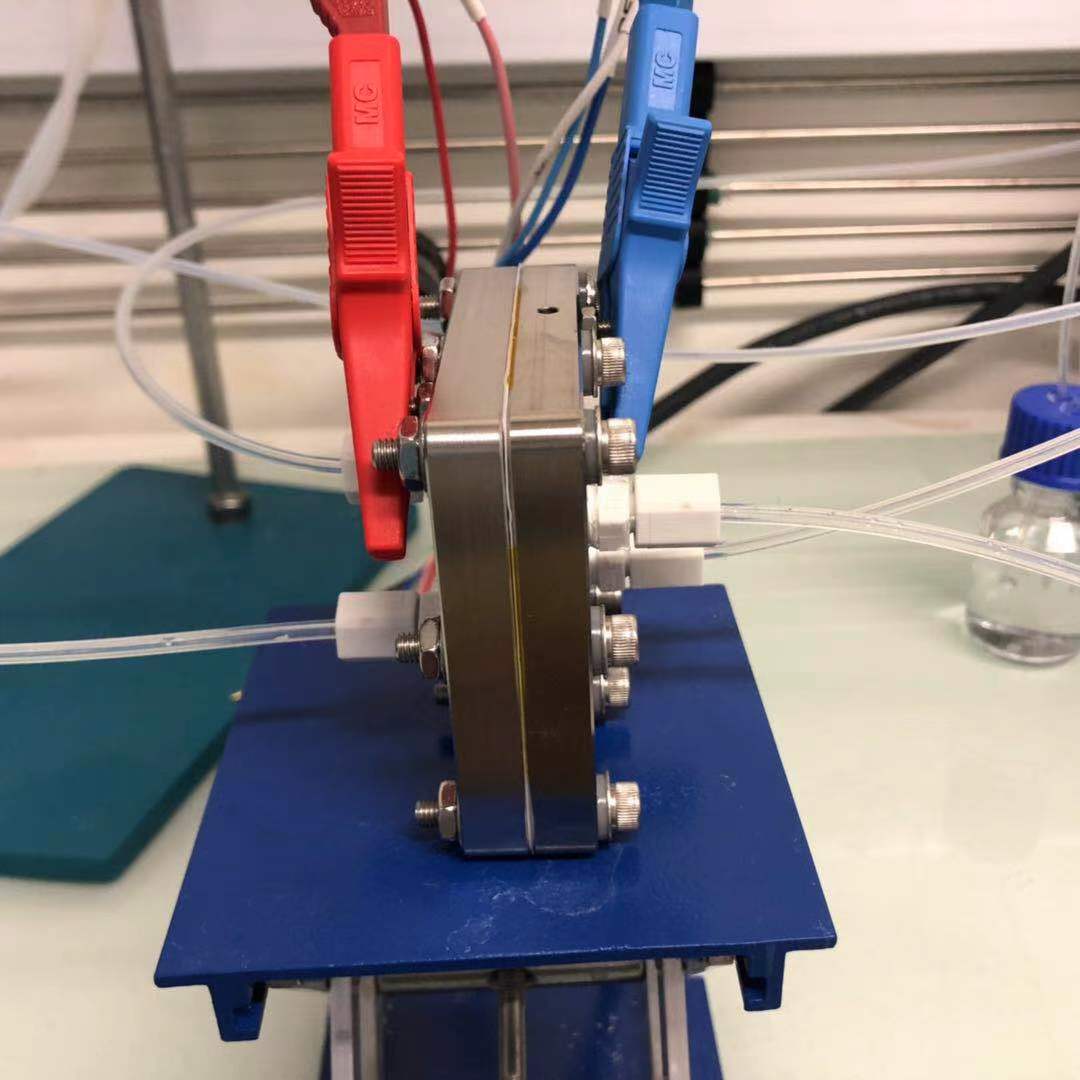


# Supplementary Figure 24. Photograph of a 4-cm-2 membrane–electrode-assembly (MEA) cell.


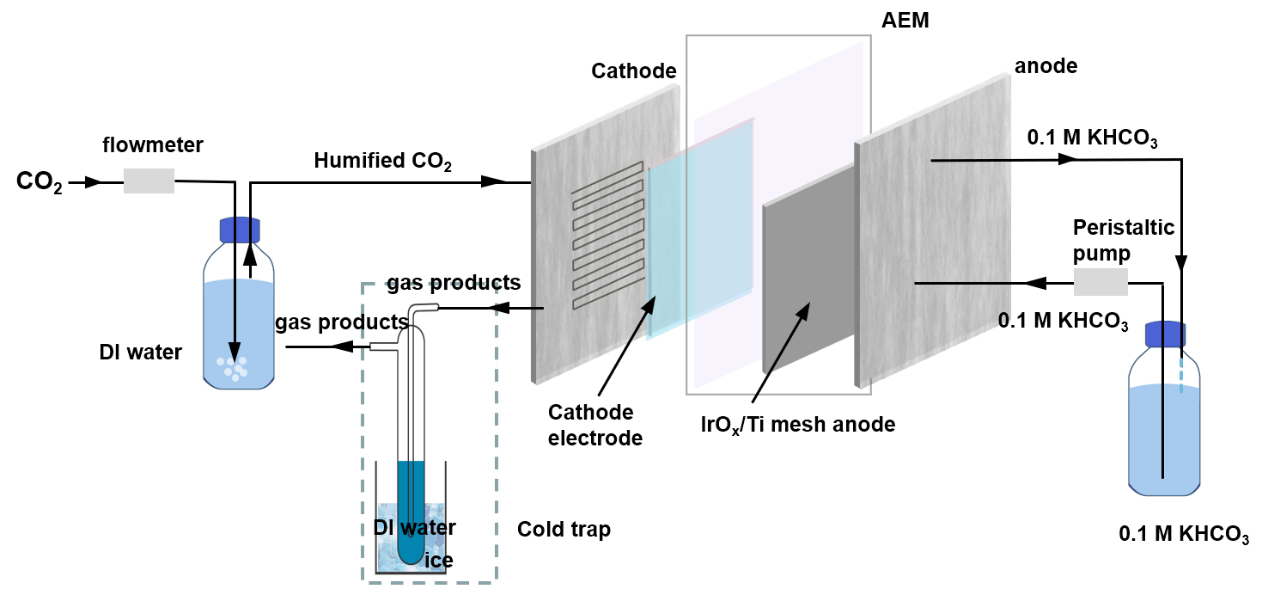


# **Supplementary Figure 25. Schematic representation of the experimental setup for the CO2 electrolysis in a MEA electrolyzer.** The geometric area of the cathode is 4 cm2, of which 45% is the gas channel while the rest 55% is the land area.





# Supplementary Figure 26.Linear sweep voltammetry (LSV) curves of the N2SN-functionalized Ag-Cu catalyst. The LSVs curves were measured in a 0.1 M KHCO3 anolyte solution while supplying Ar (black) and CO2 (red) to the cathode compartment of the MEA device.


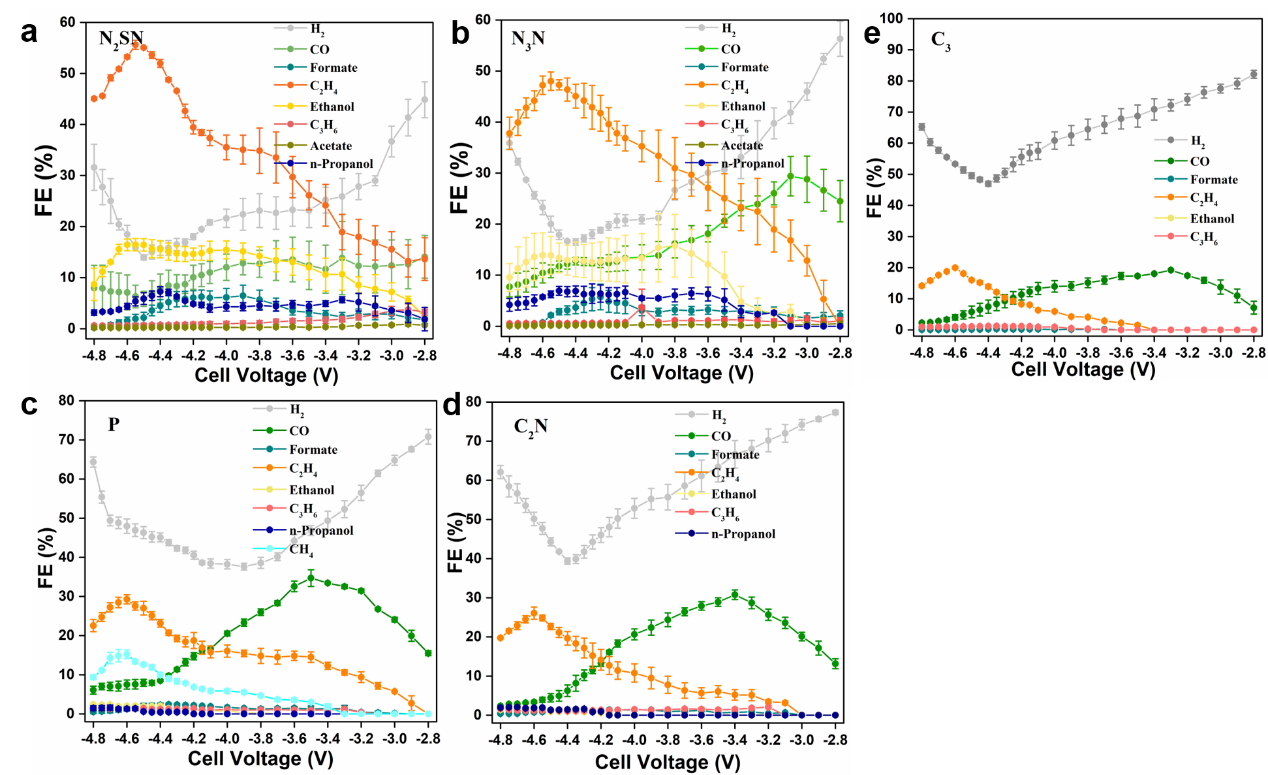


# **Supplementary Figure 27.** Electrocatalytic CO2RR properties of the MEA electrolyzers using the different Ag-Cu catalysts. The corresponding Faradaic efficiency for the gas and liquid products on N2SN-Ag-Cu (a), N3N-Ag-Cu (b), C2N-Ag-Cu (d), C3-Ag-Cu (e) compared to pristine (c) catalysts at increasing cell voltages. The error bars represent the standard deviation of the measurements based on three independent samples.


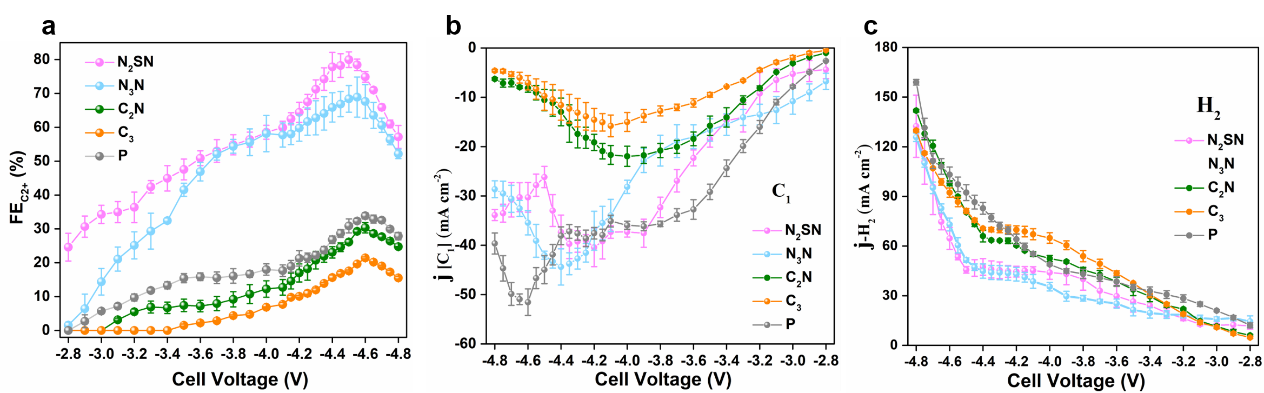


# **Supplementary Figure 28. CO2 electroreduction performance in the MEA electrolyzers.** Faradaic efficiency for the C2+ (C2H4, C2H5OH, n-propanol and acetate) (a), *j*–V plots of the partial current densities for the C1 (CO, CH4 and HCOOH) (b) and H2 products (c) on N2SN-Ag-Cu, N3N-Ag-Cu, C2N-Ag-Cu, C3-Ag-Cu compared to pristine measured with a 0.1 M KHCO3 anolyte solution.





# **Supplementary Figure 29. Enhancement factor of FEC2+ for N2SN-Ag-Cu and N3N-Ag-Cu compared to pristine.**





# **Supplementary Figure 30. S**electivity for C1-2+ hydrocarbons on the different electrodes in the MEA electrolyzers. The estimated ratio for and on the different Ag-Cu electrodes measured with a 0.1 M KHCO3 anolyte solution.


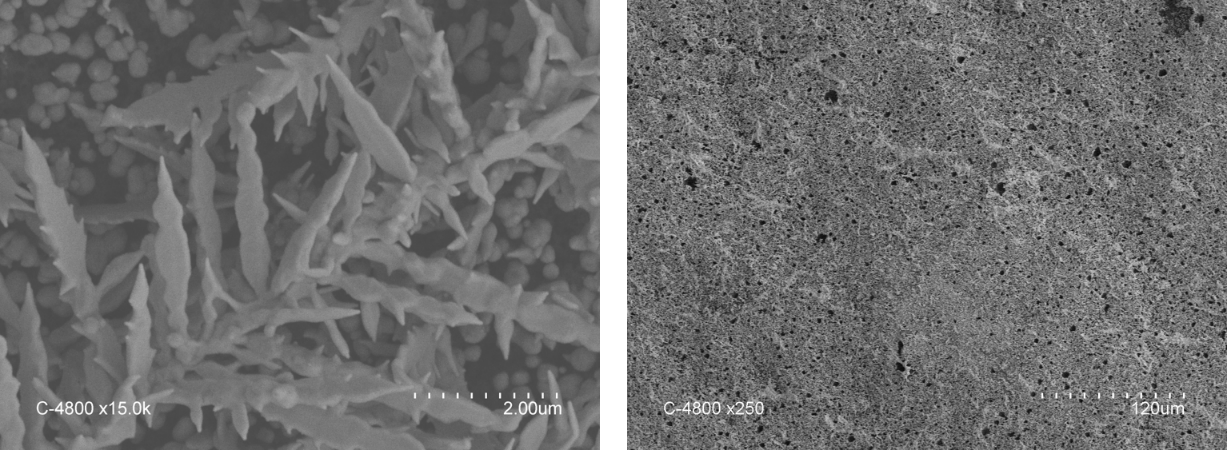


# Supplementary Figure 31. SEM pictures of the N2SN-Ag-Cu catalyst after electrolysis in MEA.

# **Supplementary Table 1. Summary of the total energy and adsorption energy of the different configurations of the thiadiazole-functionalized Cu catalyst.** The different configurations are presented in Supplementary Figure 4.

| **Configuration** | **Energy**  **(eV)** | | **Slab (eV)** | **Functional molecular (eV)** | **Adsorption energy (eV)** |
| --- | --- | --- | --- | --- | --- |
| S1-C2-S2 | | -222.80 | -161.30 | -60.79 | -0.71 |
| S1 | | -222.40 | -161.30 | -60.79 | -0.30 |
| N2-N3 | | -223.58 | -161.30 | -60.79 | -1.08 |
| N1-S1 | | -222.53 | -161.30 | -60.79 | -0.44 |
| S1-S2 | | -222.63 | -161.30 | -60.79 | -0.53 |

# Supplementary Table 2. Summary of the XPS data for N2SN-functionalized Ag-Cu at different reaction times. The atomic ratio N/Cu refers to the functionalization degree per Cu atom.

|  | **Cu (at.%)** | **N (at.%)** | **Ratios of N/Cu** |
| --- | --- | --- | --- |
| **Before** | 9.98 | 6.28 | 0.63 |
| **0.5 h** | 12.97 | 8.43 | 0.65 |
| **1 h** | 9.89 | 6.03 | 0.61 |
| **24 h** | 18.53 | 10.56 | 0.57 |
| **100 h** | 15.10 | 8.91 | 0.59 |

# Supplementary Table 3. Summary of the Cu binding energy from the Auger L3M45M45 transition modes for pristine, N2SN-, N3N-, C2N-, C3-functionalized Ag-Cu samples and H2O2-oxidized Ag-Cu.

| **Samples** | **1G (eV)** | **3F (eV)** |
| --- | --- | --- |
| **Ag-Cu(P)** | 918.3 | 921.0 |
| **N2SN** | 915.8 | 918.4 |
| **N3N** | 916.0 | 918.7 |
| **C2N** | 915.9 | 918.2 |
| **C3** | 915.9 | 918.2 |
| **H2O2-Ag-Cu** | 917.5 | ⸺ |

# Supplementary Table 4. Summary of the XANES data. E0 and corresponding oxidation states (δ) of Cu.

| **Samples** | **Cu foil** | **P** | **C3** | **C2N** | **N3N** | **N2SN** | **Cu2O** |
| --- | --- | --- | --- | --- | --- | --- | --- |
| **E0** | 8979 | 8979.08 | 8979.1 | 8979.2 | 8979.7 | 8979.8 | 8980.5 |
| **δ** | 0 | +0.05 | +0.07 | +0.13 | +0.47 | +0.53 | +1 |

# **Supplementary Table 5. Estimated ratios (in peak area) between the atop CO and the bridge CO obtained from the deconvoluted spectra.** The data represents the average values obtained from two independent sets of samples.

| **Electrode** | **Ratio (atop/bridge)** |
| --- | --- |
| **N2SN** | 0.51 |
| **N3N** | 0.32 |
| **C2N** | 2.78 |
| **C3** | 0 |
| **P** | 0.87 |

# **Supplementary Table 6. Summary of the estimated FEs for different groups functionalized Ag-Cu electrodes measured at different applied potentials in the H-cell reactors.** The standard deviation of the measurements was estimated from three independent samples.

| **Catalysts** | **E vs. RHE (V)** | **FEC2+(%)** | **FEC1(%)** | **FEH2(%)** |
| --- | --- | --- | --- | --- |
|  | -1.4 | 37.6±1.8 | 18.3±2.3 | 36.9±2.2 |
|  | -1.3 | 47.0±0.9 | 23.3±3.1 | 30.7±2.1 |
| **N2SN** | -1.2 | 57.3±1.4 | 24.9±1.2 | 22.8±2.2 |
| -1.1 | 47.8±0.6 | 27.6±0.8 | 20.9±2.5 |
| -1.0 | 43.6±0.8 | 30.5±0.6 | 18.7±1.7 |
| -0.9 | 39.1±0.6 | 36.3±0.7 | 17.1±0.7 |
| -0.8 | 38.4±1.9 | 40.1±0.5 | 16.2±0.5 |
| -0.7 | 32.5±1.9 | 38.2±0.6 | 19.0±1.4 |
| -0.6 | 25.5±2.7 | 32.6±2.3 | 29.5±0.9 |
| -0.5 | 16.6±1.2 | 24.6±0.6 | 45.2±0.5 |
| -0.4 | 8.9±1.1 | 19.1±1.5 | 45.6±1.1 |
| -0.3 | 3.8±0.8 | 13.9±1.2 | 58.8±1.4 |
|  | -1.4 | 35.1±1.4 | 9.8±0.5 | 34.9±1.8 |
|  | -1.3 | 43.2±2.5 | 12.9±1.2 | 28.9±1.8 |
| **N3N** | -1.2 | 52.8±1.5 | 16.6±0.2 | 25.0±0.9 |
| -1.1 | 49.1±1.6 | 24.6±0.9 | 23.8±0.6 |
| -1.0 | 44.9±1.8 | 31.4±0.7 | 20.7±1.2 |
| -0.9 | 39.2±1.0 | 36.6±0.9 | 17.7±0.7 |
| -0.8 | 34.7±0.7 | 43.3±0.8 | 16.3±1.2 |
| -0.7 | 28.5±0.5 | 43.7±2.2 | 23.8±4.0 |
| -0.6 | 19.4±1.0 | 35.3±1.7 | 32.4±2.8 |
| -0.5 | 12.2±0.9 | 28.1±0.6 | 42.9±3.1 |
| -0.4 | 6.3±0.3 | 24.2±1.2 | 52.1±1.7 |
| -0.3 | 3.5±1.2 | 28.5±1.2 | 61.9±0.8 |
|  | -1.4 | 5.6±1.5 | 5.3±0.3 | 86.5±1.2 |
|  | -1.3 | 6.1±0.9 | 6.2±0.2 | 84.3±1.0 |
| **C2N** | -1.2 | 5.8±0.5 | 6.8±0.3 | 83.5±0.6 |
| -1.1 | 4.2±0.6 | 8.2±0.1 | 81.2±0.6 |
| -1.0 | 3.1±0.4 | 9.2±0.1 | 78±0.7 |
| -0.9 | 0.6±0.7 | 12.9±0.2 | 73.9±0.8 |
| -0.8 | 0 | 16.3±1.0 | 71.3±0.8 |
| -0.7 | 0 | 16.7±1.5 | 75.0±0.6 |
| -0.6 | 0 | 13.2±1.0 | 77.9±2.0 |
| -0.5 | 0 | 10.7±0.6 | 80.8±1.1 |
| -0.4 | 0 | 5.3±1.2 | 84.4±0.8 |
| -0.3 | 0 | 0 | 90.6±0.8 |
|  | -1.4 | 2.1±1.1 | 7.1±0.3 | 86.0±2.5 |
|  | -1.3 | 4.4±0.2 | 9.6±1.4 | 83.8±0.9 |
| **C3** | -1.2 | 5.0±0.4 | 10.8±1.2 | 81.8±1.2 |
| -1.1 | 2.4±0.3 | 13.5±1.2 | 80.1±0.7 |
| -1.0 | 1.6±0.3 | 16.6±2.9 | 74.9±2.1 |
| -0.9 | 0 | 18.3±1.5 | 75.0±0.5 |
| -0.8 | 0 | 16.6±1.7 | 75.3±1.1 |
| -0.7 | 0 | 9.9±2.5 | 79.3±5.2 |
| -0.6 | 0 | 6.2±1.9 | 87.6±2.1 |
| -0.5 | 0 | 3.3±1.5 | 88.2±3.2 |
| -0.4 | 0 | 1.2±0.4 | 86.3±6.2 |
| -0.3 | 0 | 0.4±0.5 | 91.7±3.6 |
|  | -1.4 | 16.6±0.4 | 24.6±1.3 | 55.2±1.9 |
|  | -1.3 | 18.5±1.2 | 32.2±0.7 | 45.7±2.8 |
| **P** | -1.2 | 18.3±0.5 | 33.9±0.5 | 38.2±2.2 |
| -1.1 | 14.7±2.0 | 31.6±0.7 | 35.7±1.2 |
| -1.0 | 12.4±1.3 | 29.9±0.6 | 34.2±0.6 |
| -0.9 | 8.2±0.7 | 32.9±0.7 | 32.6±0.7 |
| -0.8 | 4.7±0.7 | 26.4±1.1 | 42.8±0.5 |
| -0.7 | 2.5±0.8 | 19.3±2.6 | 52.8±1.3 |
| -0.6 | 1.8±1.1 | 12.7±1.2 | 63.5±0.9 |
| -0.5 | 0 | 8.9±0.5 | 73.9±0.9 |
| -0.4 | 0 | 4.5±0.4 | 85.9±0.7 |
| -0.3 | 0 | 1.7±0.4 | 93.4±1.4 |

# **Supplementary Table 7. Summary of the FEs obtained on the different functionalized Ag-Cu electrodes measured at different applied potentials in the MEA electrolyzers.** The standard deviation of the measurements was estimated from three independent samples.

| **Catalysts** | **Voltage (V)** | **FEC2+(%)** | **FEC1(%)** | **FEH2(%)** |
| --- | --- | --- | --- | --- |
| **N2SN** | -2.8 | 24.6±4.1 | 15.8±4.7 | 44.8±3.5 |
| -2.9 | 30.7±3.1 | 14.8±4.9 | 41.4±3.6 |
| -3.0 | 34.3±2.7 | 15.2±5.5 | 36.7±3.0 |
| -3.1 | 34.9±3.1 | 15.1±5.6 | 28.9±1.0 |
| -3.2 | 36.4±4.5 | 15.1±5.5 | 27.8±2.6 |
| -3.3 | 42.5±1.8 | 16.2±6.9 | 25.9±3.6 |
| -3.4 | 44.9±3.8 | 14.5±4.2 | 25.2±2.5 |
| -3.5 | 47.6±3.1 | 15.6±3.9 | 23.2±3.4 |
| -3.6 | 50.8±2.2 | 17.1±3.6 | 23.3±3.2 |
| -3.7 | 53.0±3.3 | 18.0±2.5 | 22.7±3.2 |
| -3.8 | 54.8±2.9 | 18.4±1.2 | 23.1±3.3 |
| -3.9 | 56.4±2.2 | 19.3±1.5 | 20.4±3.1 |
| -4.0 | 58.7±2.0 | 18.1±2.5 | 20.6±1.8 |
| -4.1 | 59.9±1.9 | 17.0±2.0 | 19.1±0.5 |
| -4.15 | 62.5±1.8 | 16.7±2.8 | 19.5±0.1 |
| -4.2 | 64.4±2.9 | 16.1±3.5 | 18.0±0.6 |
| -4.25 | 67.5±2.2 | 14.6±2.9 | 16.9±0.7 |
| -4.3 | 71.2±2.7 | 14.1±3.4 | 16.5±1.2 |
| -4.35 | 74.2±3.3 | 13.6±3.8 | 15.8±1.4 |
| -4.4 | 77.8±4.3 | 12.4±2.9 | 15.7±1.4 |
| -4.45 | 78.2±3.5 | 10.5±2.4 | 15.0±1.4 |
| -4.5 | 79.9±2.3 | 8.0±0.5 | 13.9±0.5 |
| -4.55 | 78.5±1.7 | 8.2±1.4 | 15.9±0.6 |
| -4.6 | 74.9±1.6 | 8.7±2.8 | 18.5±1.8 |
| -4.65 | 71.0±0.9 | 8.3±3.3 | 20.4±1.1 |
| -4.7 | 65.9±0.9 | 8.0±3.5 | 25.0±4.4 |
| -4.75 | 61.0±1.1 | 8.4±4.2 | 27.7±3.4 |
| -4.8 | 57.2±3.4 | 8.1±4.3 | 31.6±4.5 |

| **Catalysts** | **Voltage (V)** | **FEC2+(%)** | **FEC1(%)** | **FEH2(%)** |
| --- | --- | --- | --- | --- |
| **N3N** | -2.8 | 1.6±1.0 | 26.6±3.1 | 56.3±3.4 |
| -2.9 | 6.4±4.3 | 28.4±3.2 | 52.4±1.1 |
| -3.0 | 14.4±3.9 | 30.5±3.8 | 45.9±1.7 |
| -3.1 | 21.1±3.5 | 31.4±2.7 | 41.9±2.1 |
| -3.2 | 25.1±3.9 | 28.6±1.0 | 39.8±3.0 |
| -3.3 | 29.4±5.3 | 26.8±0.5 | 35.7±4.6 |
| -3.4 | 32.5±0.8 | 26.1±0.9 | 33.1±4.2 |
| -3.5 | 41.6±1.9 | 23.5±0.6 | 30.7±5.1 |
| -3.6 | 46.9±2.7 | 21.4±1.5 | 30.1±1.8 |
| -3.7 | 52.1±1.7 | 19.9±2.6 | 28.3±1.5 |
| -3.8 | 54.4±2.0 | 19.4±2.6 | 26.7±1.9 |
| -3.9 | 55.6±3.9 | 16.6±3.0 | 21.2±1.3 |
| -4.0 | 58.1±5.3 | 16.5±2.6 | 20.9±0.9 |
| -4.1 | 57.7±3.6 | 17.8±3.9 | 20.7±1.1 |
| -4.15 | 58.1±3.1 | 17.3±3.5 | 20.7±1.4 |
| -4.2 | 59.8±3.9 | 17.3±3.2 | 19.6±0.8 |
| -4.25 | 61.7±4.0 | 18.2±2.8 | 18.8±0.6 |
| -4.3 | 62.8±5.0 | 17.6±2.3 | 18.0±0.8 |
| -4.35 | 64.1±4.9 | 17.2±1.9 | 17.2±0.7 |
| -4.4 | 65.9±4.3 | 16.4±1.5 | 16.5±0.6 |
| -4.45 | 66.9±3.7 | 15.3±0.8 | 16.7±0.2 |
| -4.5 | 68.4±3.9 | 14.6±0.7 | 17.9±0.9 |
| -4.55 | 68.9±5.9 | 12.9±1.0 | 20.0±1.6 |
| -4.6 | 67.6±4.9 | 11.2±2.2 | 23.3±1.4 |
| -4.65 | 63.5±3.8 | 10.0±2.0 | 25.7±0.7 |
| -4.7 | 60.6±2.1 | 9.1±2.3 | 28.7±0.3 |
| -4.75 | 56.4±1.5 | 8.5±2.5 | 32.3±0.6 |
| -4.8 | 52.2±1.4 | 8.1±2.2 | 35.9±1.2 |

| **Catalysts** | **Voltage (V)** | **FEC2+(%)** | **FEC1(%)** | **FEH2(%)** |
| --- | --- | --- | --- | --- |
| **C2N** | -2.8 | 0 | 13.2±1.2 | 77.3±0.6 |
| -2.9 | 0 | 17.1±1.8 | 75.7±0.6 |
| -3.0 | 0 | 20.1±1.0 | 74.2±1.3 |
| -3.1 | 3.2±0.5 | 24.3±1.4 | 72.0±2.3 |
| -3.2 | 5.5±0.8 | 26.1±1.4 | 70.2±2.9 |
| -3.3 | 6.9±1.7 | 29.5±0.8 | 68.0±2.2 |
| -3.4 | 6.7±1.7 | 31.5±0.8 | 66.7±3.5 |
| -3.5 | 7.4±1.8 | 29.5±0.6 | 63.4±3.8 |
| -3.6 | 7.2±1.7 | 29.1±0.7 | 61.1±4.0 |
| -3.7 | 7.9±2.1 | 27.5±0.7 | 58.6±3.4 |
| -3.8 | 9.2±2.2 | 25.3±1.5 | 55.7±3.3 |
| -3.9 | 10.8±2.8 | 23.7±1.8 | 55.2±2.7 |
| -4.0 | 12.3±2.4 | 22.0±1.4 | 52.8±2.5 |
| -4.1 | 12.7±2.3 | 19.7±0.9 | 50.3±2.5 |
| -4.15 | 14.6±2.3 | 17.5±0.4 | 48.1±2.5 |
| -4.2 | 16.9±2.7 | 14.5±0.7 | 46.0±1.9 |
| -4.25 | 18.2±3.4 | 12.7±0.8 | 44.3±1.8 |
| -4.3 | 20.7±2.6 | 11.4±1.3 | 41.8±1.6 |
| -4.35 | 21.9±1.8 | 9.5±1.9 | 39.9±1.1 |
| -4.4 | 23.1±1.7 | 7.7±1.4 | 39.4±0.8 |
| -4.45 | 24.6±1.3 | 6.3±1.3 | 41.8±0.2 |
| -4.5 | 26.1±0.7 | 5.8±1.3 | 44.3±1.0 |
| -4.55 | 29.3±0.7 | 4.8±0.6 | 47.7±1.6 |
| -4.6 | 30.3±1.5 | 4.2±0.3 | 50.1±1.7 |
| -4.65 | 28.6±0.9 | 3.9±0.6 | 53.6±1.8 |
| -4.7 | 27.7±0.8 | 3.3±0.3 | 56.7±2.5 |
| -4.75 | 26.4±0.4 | 3.3±0.3 | 58.5±2.7 |
| -4.8 | 24.7±0.1 | 2.7±0.2 | 62.1±1.7 |

| **Catalysts** | **Voltage (V)** | **FEC2+(%)** | **FEC1(%)** | **FEH2(%)** |
| --- | --- | --- | --- | --- |
| **C3** | -2.8 | 0 | 7.1±2.0 | 82.1±1.3 |
| -2.9 | 0 | 10.9±2.1 | 79.2±1.7 |
| -3.0 | 0 | 13.7±2.2 | 77.6±1.4 |
| -3.1 | 0 | 15.9±0.9 | 76.3±1.8 |
| -3.2 | 0 | 17.4±0.4 | 74.1±1.8 |
| -3.3 | 0 | 19.2±0.1 | 72.2±1.8 |
| -3.4 | 0 | 18.0±0.1 | 70.9±3.4 |
| -3.5 | 1.5±0.4 | 17.3±0.3 | 68.7±3.6 |
| -3.6 | 2.2±0.2 | 17.3±1.1 | 67.9±3.3 |
| -3.7 | 2.9±0.1 | 16.2±1.3 | 65.9±2.8 |
| -3.8 | 4.4±0.2 | 15.3±1.5 | 64.4±3.3 |
| -3.9 | 4.7±0.4 | 14.2±1.3 | 62.5±3.2 |
| -4.0 | 6.9±0.2 | 14.1±1.8 | 60.8±2.8 |
| -4.1 | 7.7±0.6 | 13.5±1.9 | 57.5±2.7 |
| -4.15 | 9.8±0.6 | 12.5±1.5 | 56.9±2.5 |
| -4.2 | 10.1±0.3 | 11.5±1.7 | 55.6±2.5 |
| -4.25 | 10.9±0.9 | 10.5±2.0 | 53.2±2.4 |
| -4.3 | 11.9±0.6 | 9.4±2.1 | 50.5±1.5 |
| -4.35 | 13.9±0.3 | 8.6±2.1 | 48.7±1.1 |
| -4.4 | 15.6±0.8 | 7.7±2.0 | 46.9±0.8 |
| -4.45 | 16.8±0.6 | 6.7±1.9 | 48.3±0.7 |
| -4.5 | 17.5±0.3 | 5.9±1.8 | 49.6±0.9 |
| -4.55 | 19.6±0.2 | 4.9±1.4 | 51.4±1.0 |
| -4.6 | 21.4±0.3 | 4.1±0.8 | 53.3±0.4 |
| -4.65 | 20.2±0.2 | 3.4±0.6 | 55.5±0.4 |
| -4.7 | 19.0±0.6 | 2.9±0.2 | 57.7±0.9 |
| -4.75 | 17.3±0.6 | 2.4±0.5 | 60.3±1.1 |
| -4.8 | 15.6±0.5 | 2.3±0.1 | 65.2±1.0 |

| **Catalysts** | **Voltage (V)** | **FEC2+(%)** | **FEC1(%)** | **FEH2(%)** |
| --- | --- | --- | --- | --- |
| **Pristine (P)** | -2.8 | 0 | 15.5±0.6 | 70.8±1.9 |
| -2.9 | 2.7±1.9 | 19.9±2.0 | 67.6±0.7 |
| -3.0 | 5.7±0.1 | 24.2±2.3 | 64.8±1.3 |
| -3.1 | 7.2±0.8 | 27.1±1.4 | 61,5±0.8 |
| -3.2 | 9.7±1.0 | 31.9±2.4 | 56.5±1.9 |
| -3.3 | 11.8±0.8 | 33.8±1.4 | 52.3±2.2 |
| -3.4 | 13.4±1.0 | 36.6±1.9 | 49.4±2.4 |
| -3.5 | 15.5±1.3 | 39.0±1.2 | 46.9±1.2 |
| -3.6 | 15.9±1.1 | 37.6±1.2 | 44.2±1.6 |
| -3.7 | 15.6±1.7 | 33.3±2.2 | 40.2±1.0 |
| -3.8 | 16.1±2.1 | 31.9±0.7 | 38.6±1.4 |
| -3.9 | 16.7±1.0 | 30.0±0.9 | 37.6±0.9 |
| -4.0 | 18.0±1.7 | 28.1±1.1 | 38.2±1.2 |
| -4.1 | 17.6±1.7 | 24.4±1.9 | 38.4±1.2 |
| -4.15 | 18.9±1.7 | 24.6±0.9 | 38.6±0.5 |
| -4.2 | 21.3±2.3 | 23.7±1.1 | 40.5±1.0 |
| -4.25 | 21.5±1.4 | 23.3±1.1 | 41.8±0.8 |
| -4.3 | 22.3±1.0 | 22.0±1.3 | 42.3±0.7 |
| -4.35 | 23.8±1.0 | 21.1±1.2 | 43.8±0.8 |
| -4.4 | 26.8±1.1 | 20.7±1.1 | 45.1±1.1 |
| -4.45 | 28.7±1.1 | 21.9±1.2 | 45.2±1.4 |
| -4.5 | 30.9±2.1 | 22.6±1.7 | 46.3±1.5 |
| -4.55 | 32.4±0.8 | 22.5±1.8 | 46.9±1.6 |
| -4.6 | 33.9±0.9 | 24.0±2.3 | 48.0±1.9 |
| -4.65 | 32.9±1.2 | 23.1±2.7 | 48.8±1.5 |
| -4.7 | 32.5±0.8 | 22.2±2.8 | 49.4±1.4 |
| -4.75 | 29.9±0.4 | 18.8±2.5 | 55.4±1.5 |
| -4.8 | 27.8±1.1 | 16.0±1.6 | 64.3±1.3 |
